# Supplementary material
Source: PubMed Central journal article supplement (PMC4442871)
Supplement: supp_M057661_jlr.M057661-1.pdf [file supp_M057661_jlr.M057661-1.pdf]

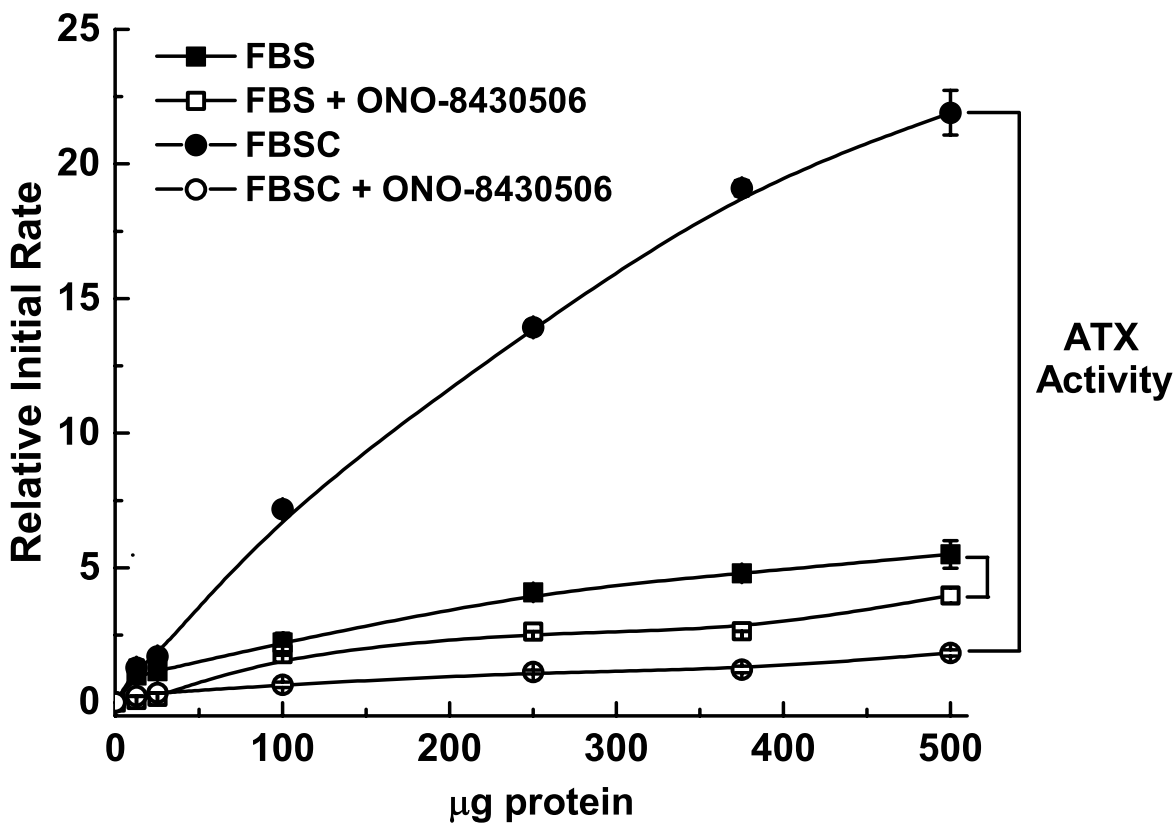

**Supplemental Figure 1. Lipids in FBS almost completely inhibit measured activity in the FS-3 assay attributable to ATX activity.** FBS or FBSC (delipidated serum) was incubated with or without 10 nM of the ATX inhibitor ONO-8430506 using 5 µM of FS-3. The difference in measured rates between samples treated with or without ONO-8430506 is the actual ATX activity in the sample (Fig. 2D). Results are means ± SEM from three independent experiments.

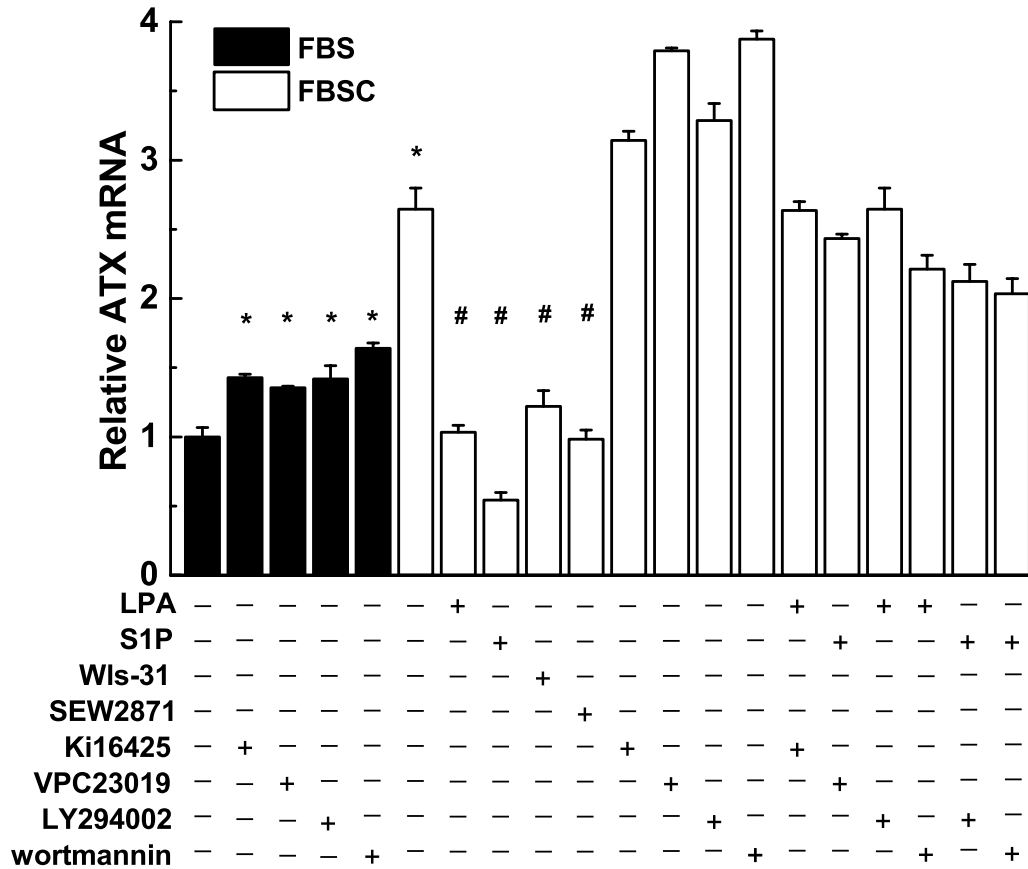

**Supplemental Figure 2. LPA and S1P inhibit ATX mRNA expression through LPA and S1P receptor-mediated activation of phosphatidylinositol 3-kinase.** MDA-MB-435S cells were incubated in FBS or FBSC in the presence of 5  $\mu$ M LPA or S1P, agonists (1  $\mu$ M wls-31 or SEW2871), antagonists (1  $\mu$ M Ki16425 or VPC23019) and inhibitors (10  $\mu$ M LY294402 or 1  $\mu$ M wortmannin) as shown. Results are means  $\pm$  SEM from three independent experiments. \*, indicates a significant increase ( $P < 0.05$ ) in ATX mRNA compared to FBS treatment. #, indicates a significant decrease ( $P < 0.05$ ) in ATX mRNA compared to FBSC treatment.

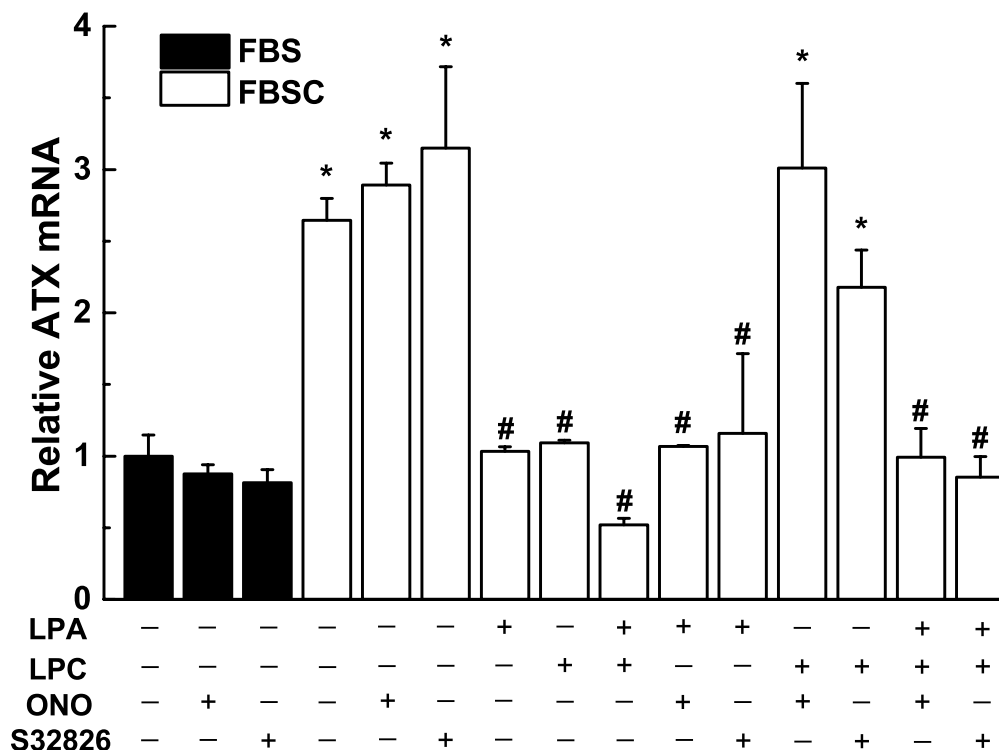

**Supplemental Figure 3. LPC-mediated inhibition of ATX mRNA activity is blocked by ATX inhibitors.** MDA-MB-435S cells were incubated in FBS or FBSC supplemented with 1% BSA in the presence of 5  $\mu$ M LPA and/or 100  $\mu$ M LPC with 10  $\mu$ M ATX inhibitors ONO-8430506 or S32826. Results are means  $\pm$  SEM from three independent experiments. \*, indicates a significant increase ( $P < 0.05$ ) compared to FBS treatment. #, indicates a significant decrease ( $P < 0.05$ ) compared to FBSC treatment.
